# Supplementary material
Source: Springer Nature journal article supplement (https://www.springerprofessional.de/resource/supplementary/13638_2013_856_MOESM5_ESM.pdf/11899094)

$$\mu_{V \rightarrow S}^{(2)} = 1, \alpha = 0.01$$

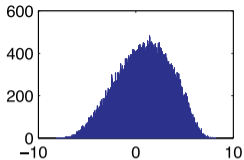

$$\mu_{V \rightarrow S}^{(2)} = 1.8, \alpha = 0.01$$

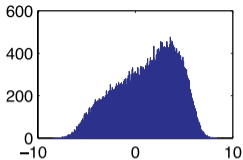

$$\mu_{V \rightarrow S}^{(2)} = 3.24, \alpha = 0.01$$

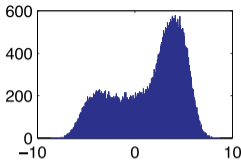

$$\mu_{V \rightarrow S}^{(2)} = 1, \alpha = 0.1$$

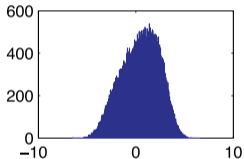

$$\mu_{V \rightarrow S}^{(2)} = 1.8, \alpha = 0.1$$

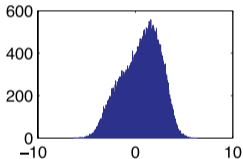

$$\mu_{V \rightarrow S}^{(2)} = 3.24, \alpha = 0.1$$

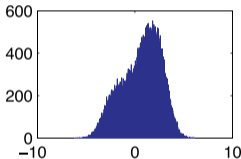

$$\mu_{V \rightarrow S}^{(2)} = 1, \alpha = 0.2$$

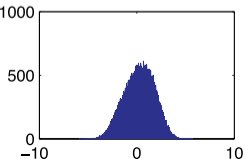

$$\mu_{V \rightarrow S}^{(2)} = 1.8, \alpha = 0.2$$

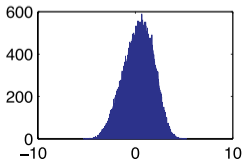

$$\mu_{V \rightarrow S}^{(2)} = 3.24, \alpha = 0.2$$

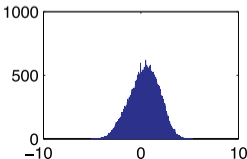

Supplement: MOESM5 [file 11899094]
